# Supplementary material for: Can real-time visual feedback during gait retraining reduce metabolic demand for individuals with transtibial amputation?
Source: PLoS One. 2017 Feb 9;12(2):e0171786. doi: 10.1371/journal.pone.0171786 (PMC5300156; doi:10.1371/journal.pone.0171786)
Supplement: S1 File — (XLSX) [file pone.0171786.s001.xlsx]

## Sheet: Data
Subject	Group	Gender	Age	Height	Mass	Leg Length	Speed	Months Ambulating	Control (NOF)	Control (NOF)	Control (NOF)	TTA (NOFEMG)	TTA (VFEMG)	TTA (NOFEMG)	TTA (VFEMG)	TTA (NOFCOM)	TTA (VFCOM)	TTA (NOFCOM)	TTA (VFCOM)	TTA (NOFEMG)	TTA (VFEMG)	TTA (NOFEMG)	TTA (VFEMG)	TTA (NOFEMG)	TTA (VFEMG)	TTA (NOFEMG)	TTA (VFEMG)	TTA (NOFEMG)	TTA (VFEMG)	TTA (NOFEMG)	TTA (VFEMG)	TTA (NOFEMG)	TTA (VFEMG)	TTA (NOFEMG)	TTA (VFEMG)	TTA (NOFEMG)	TTA (VFEMG)	TTA (NOFEMG)	TTA (VFEMG)	TTA (NOFEMG)	TTA (VFEMG)	TTA (NOFEMG)	TTA (VFEMG)	TTA (NOFEMG)	TTA (VFEMG)	TTA (NOFEMG)	TTA (VFEMG)	TTA (NOFEMG)	TTA (VFEMG)
																																0-20% of gait cycle	0-20% of gait cycle	0-20% of gait cycle	0-20% of gait cycle	80-100% of gait cycle	80-100% of gait cycle	80-100% of gait cycle	80-100% of gait cycle	0-20% of gait cycle	0-20% of gait cycle	0-20% of gait cycle	0-20% of gait cycle	80-100% of gait cycle	80-100% of gait cycle	80-100% of gait cycle	80-100% of gait cycle	0-20% of gait cycle	0-20% of gait cycle
									VO2	Metabolic Cost	HR	VO2	VO2	Metabolic Cost	Metabolic Cost	VO2	VO2	Metabolic Cost	Metabolic Cost	HR	HR	HR	HR	Peak VL (Amputated side)	Peak VL (Amputated side)	Peak VL (Intact side)	Peak VL (Intact side)	Peak BF (Amputated side)	Peak BF (Amputated side)	Peak BF (Intact side)	Peak BF (Intact side)	iVL (Amputated side)	iVL (Amputated side)	iVL (Intact side)	iVL (Intact side)	iVL (Amputated side)	iVL (Amputated side)	iVL (Intact side)	iVL (Intact side)	iBF (Amputated side)	iBF (Amputated side)	iBF (Intact side)	iBF (Intact side)	iBF (Amputated side)	iBF (Amputated side)	iBF (Intact side)	iBF (Intact side)	CCI (Amputated side)	CCI (Amputated side)
1	TTA	M	39	1.88	94.09	0.99	1.24656	2.5	.	.	.	14.93	17.35	0.199617	0.231924	14.55	14.44	0.19447	0.193006	86.55	94.03	87.92	87.23	42.23	20.05	22.64	26.51	68.7	45.6	20.77	14.28	5040.96	2202.87	2137.53	2461.62	1462.18	475.25	409.68	767.22	5133.52	7037.74	431.49	1479.49	6077.49	3696.65	2474.95	1601.93	100.64	152.44
2	TTA	M	42	1.66	78.18	0.91	1.19513	29	.	.	.	16.24	14.11	0.226459	0.196806	14.11	14.25	0.196806	0.198676	103.33	101.62	98.12	99.62	39.53	27.54	45.73	39.13	24.22	19.37	15.29	12.54	5092.09	3896.34	5818.99	5169.61	1343.42	1348.55	1522.71	1598.49	3376.93	3372.07	1823.6	783	3158.3	2632.98	1388.3	1088.4	79.22	92.72
3	TTA	M	34	1.66	84.5	0.85	1.15506	26	.	.	.	13.89	13.48	0.200437	0.194534	13.31	13.58	0.192019	0.195981	146.89	155.09	155.55	162.22	15.52	15.63	30.64	19.27	56.94	53.45	27.02	30.14	1648.07	1830.44	3425.38	2019.99	684.63	650.88	594.75	423.6	7742.87	6652.76	607.04	443.25	5672.76	5346.55	2696.67	3328.06	164.35	155.78
4	TTA	M	34	1.785	97.9	0.96	0.95	12	.	.	.	13.48	13.28	0.236535	0.233018	13.06	13.7	0.229049	0.240286	103.21	103.43	102.15	108.41	27.84	25.14	18.05	17.1	30.04	24.35	11.96	11.18	3504.41	3486.3	2231.36	2093.94	1001.27	883.77	1228.01	990.31	1657.22	1354.72	965.58	518.76	3039.15	2477.72	1327.83	1138.88	59.22	54.67
5	TTA	M	27	1.675	57	0.84	1.14824	23	.	.	.	20.43	21.69	0.296577	0.314815	21.1	25.03	0.306248	0.363265	142.37	147.95	143.31	159.79	21.29	22.98	10.41	12.31	11.02	13.9	11.79	8.61	2089.82	2357.13	1236.89	1427.76	691.96	657.8	615.29	612.71	1463.48	2014.97	485.52	444.12	1121.62	1565.31	1279.12	975.07	82.77	88.39
6	TTA	M	25	1.85	108.46	0.97	1.13	12	.	.	.	13.16	13.44	0.194114	0.198156	12.67	12.88	0.186817	0.189997	101.07	105.34	105.76	106.65	31.04	32.75	14.71	10.66	16.06	22.23	17.93	19.1	3826.16	4054.36	1703.33	1185.32	724.99	649.23	499.21	436.85	777.53	870.07	460.62	397.17	1909.62	2120.12	1874.63	1768	34.3	35.15
7	TTA	M	31	1.76	112.45	0.95	1.22111	8	.	.	.	17.32	16.91	0.236452	0.230777	16.39	18.79	0.223754	0.256461	151.48	147.97	142.53	161.59	29.55	30.79	31.57	25.36	13.45	12.99	14.48	31.15	3218.25	3567.01	3652.86	2933.92	823.91	869.54	1427.55	1136.25	3272.79	2936.68	3872.37	4538.15	1628.9	1617.98	1259.7	2173.74	100.56	89.65
8	TTA	M	31	1.77	118.82	0.95	1.22111	120	.	.	.	12.89	13.1	0.175916	0.178818	11.62	12.23	0.158565	0.166908	110.38	110	108.73	111.41	45.42	44.08	19.7	21.35	30.98	29.3	7.16	7.05	6310.38	5519.35	2084.66	1926.56	1037.42	1349.84	287.17	648.13	5739.81	7883.49	572.69	253.76	3346.61	2641.42	661.57	769.45	95.17	117.46
1	Control	M	38	1.77	85.29	0.93	1.20819	.	14.2376	0.19611	81.2258	.	.	.	.	.	.	.	.	.	.	.	.	.	.	20.35	.	.	.	5.83	.	.	.	2764.94	.	.	.	1108.78	.	.	.	491.81	.	.	.	793.55	.	.	.
2	Control	M	26	1.77	74.21	0.94	1.21467	.	15.4699	0.213084	89.7222	.	.	.	.	.	.	.	.	.	.	.	.	.	.	30.64	.	.	.	12.67	.	.	.	3836.88	.	.	.	953.25	.	.	.	1633.9	.	.	.	1617.82	.	.	.
3	Control	M	30	1.83	80.1	1.02	1.2653	.	13.3892	0.175711	89.5385	.	.	.	.	.	.	.	.	.	.	.	.	.	.	37.64	.	.	.	16.39	.	.	.	4743.67	.	.	.	1247.74	.	.	.	1967.05	.	.	.	1187.77	.	.	.
4	Control	M	30	1.76	73.87	0.96	1.22752	.	13.8138	0.187179	85.0857	.	.	.	.	.	.	.	.	.	.	.	.	.	.	25.61	.	.	.	8.67	.	.	.	3467.6	.	.	.	368.31	.	.	.	744.03	.	.	.	788.42	.	.	.
5	Control	M	29	1.87	104	0.99	1.24656	.	13.7536	0.183381	82.3913	.	.	.	.	.	.	.	.	.	.	.	.	.	.	35.25	.	.	.	9.02	.	.	.	4367.1	.	.	.	788.42	.	.	.	874.89	.	.	.	2418.11	.	.	.
6	Control	M	27	1.88	94.09	0.99	1.24656	.	14.2599	0.190132	83.8529	.	.	.	.	.	.	.	.	.	.	.	.	.	.	36.99	.	.	.	9.41	.	.	.	4567.95	.	.	.	1057.93	.	.	.	556.06	.	.	.	1863.41	.	.	.
7	Control	M	27	1.74	52.82	0.91	0.925744	.	14.1556	0.253685	81.561	.	.	.	.	.	.	.	.	.	.	.	.	.	.	31.96	.	.	.	10.74	.	.	.	3528.98	.	.	.	1067.16	.	.	.	901.32	.	.	.	1489.73	.	.	.
8	Control	M	28	1.79	78.82	0.99	1.15	.	16.783	0.243233	84.9455	.	.	.	.	.	.	.	.	.	.	.	.	.	.	42.52	.	.	.	6.19	.	.	.	4919.94	.	.	.	1879.22	.	.	.	396.08	.	.	.	1074.7	.	.	.
[truncated: 6 more columns]
